# Supplementary material
Source: PubMed Central journal article supplement (PMC8642297)
Supplement: NIHMS1746949-supplement-Supplementary.pdf [file NIHMS1746949-supplement-Supplementary.pdf]

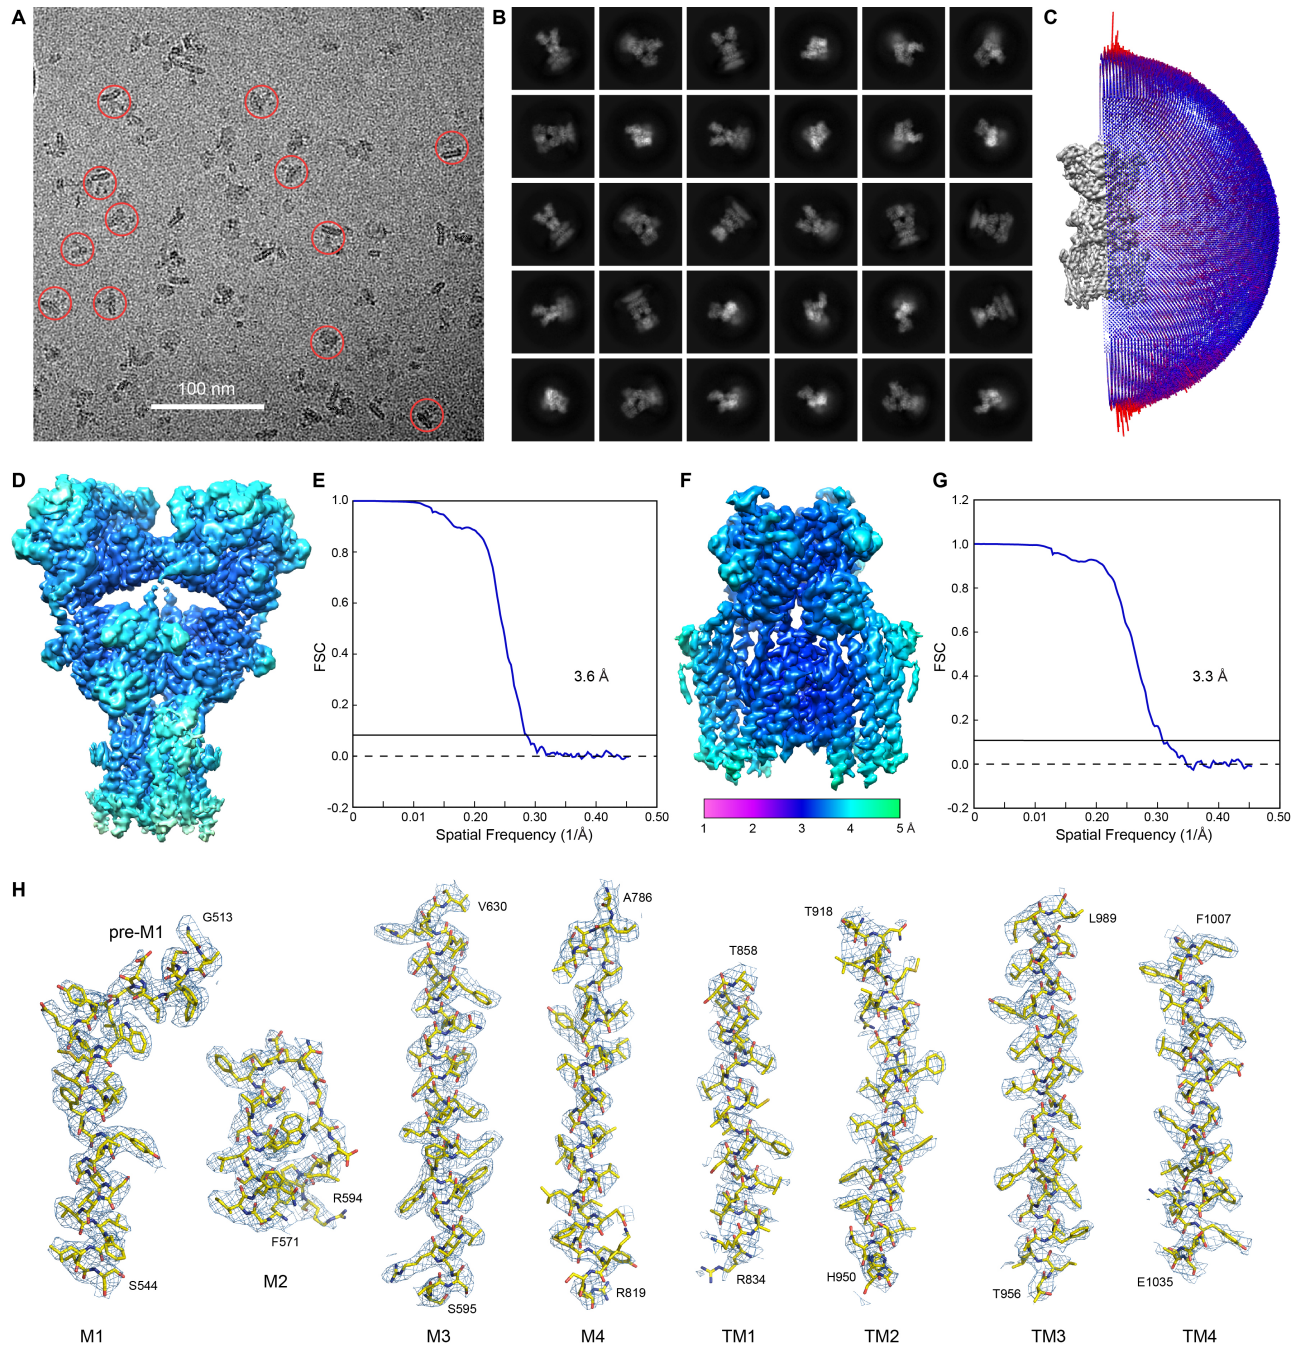

**Figure S1. Overview of single-particle cryo-EM for GluA2- $\gamma$ 5 in complex with competitive antagonist ZK200775, Related to Figure 1**

A. Representative micrograph with example particles circled in red. B. Reference-free 2D class averages illustrating different particle orientations. C. Distribution of particle Euler angle orientations contributing to the final reconstruction, with larger red cylinders representing orientations comprising more particles. D-G. Local resolution presented as coloring of the cryo-EM map (D and F) and FSC curves (E and G) for the full-length (D and E) and LBD-TMD-focused (F and G) reconstructions of GluA2- $\gamma$ 5<sub>ZK</sub>. H. Fragments of the 3.3-Å resolution LBD-TMD-focused GluA2- $\gamma$ 5<sub>ZK</sub> reconstruction map for GluA2 (M1-M4) and  $\gamma$ 5 (TM1-TM4) membrane segments.

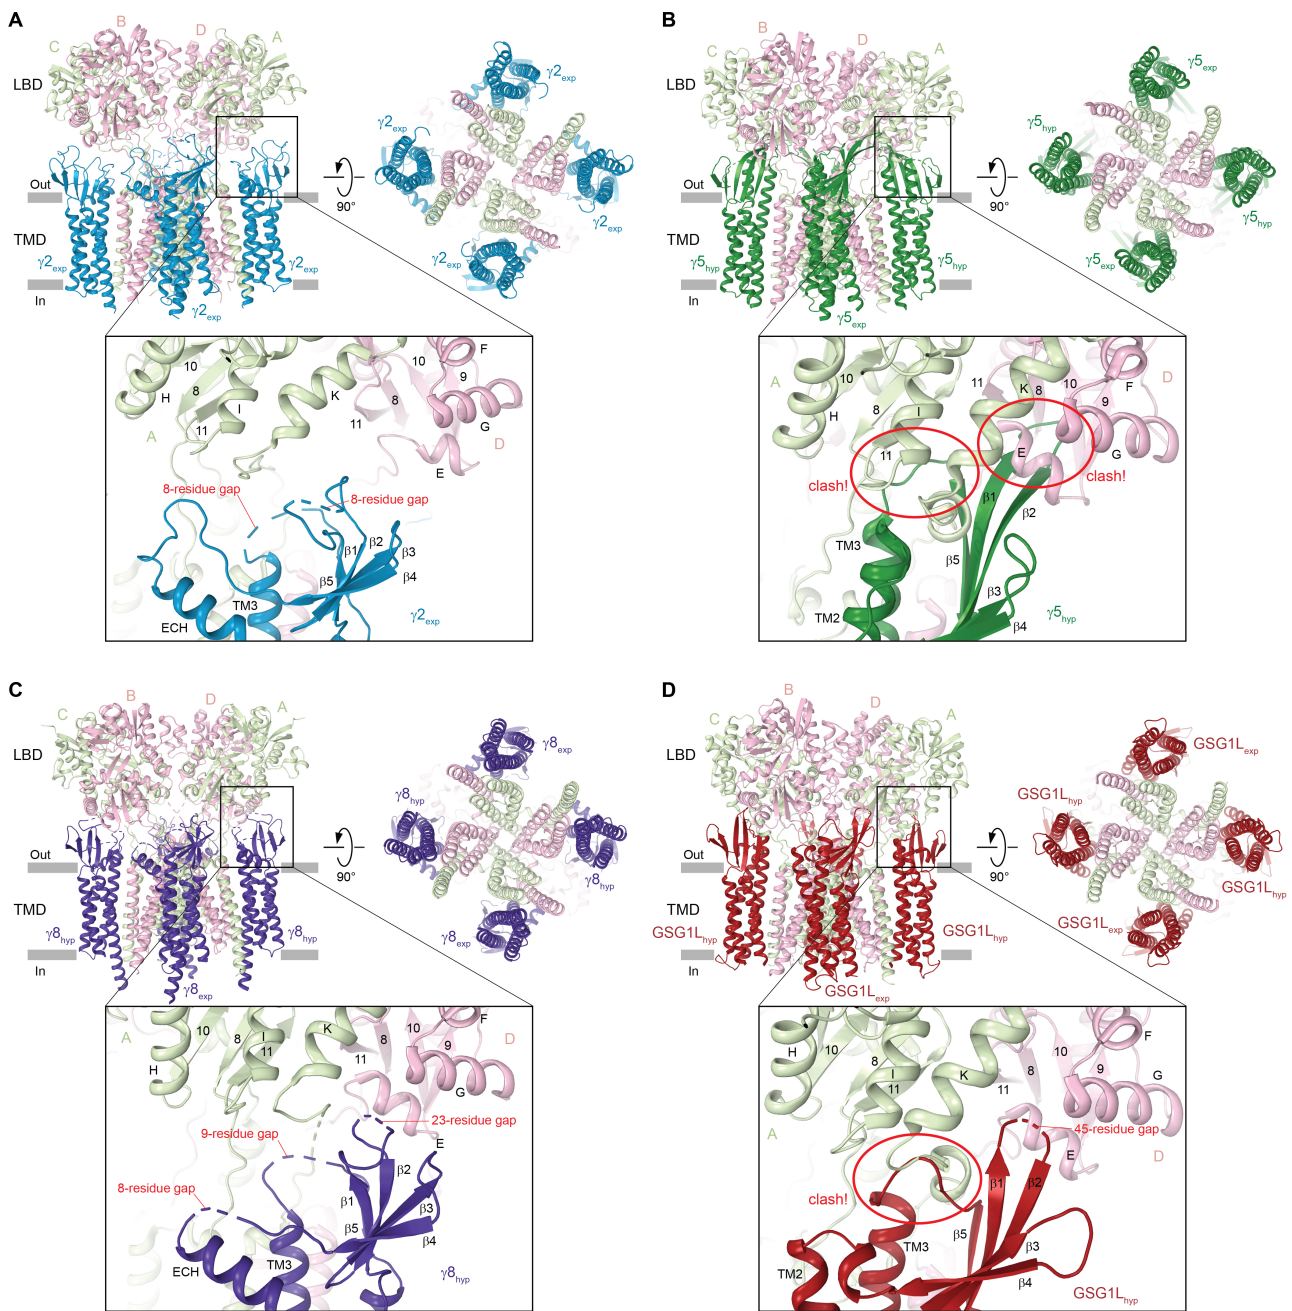

**Figure S2. Probing stoichiometry of AMPA receptor-auxiliary subunit complexes using steric clash analysis, Related to Figure 2**

A-D. LBD-TMD portions of AMPA receptor in complex with auxiliary subunits  $\gamma 2$  (A; PDB 5WEO),  $\gamma 5$  (B; GluA2- $\gamma 5_{\text{Quis}}$ ),  $\gamma 8$  (C; PDB 7OCE) and GSG1L (D; GluA2-GSG1L $_{\text{Quis}}$ ) viewed parallel to the membrane (left) or intracellularly (right), with the contact regions between the head domains of auxiliary subunits and LBDs shown as insets. AMPA receptor subunits are colored light green and pink. The names of experimentally observed (exp) and hypothetical (hyp) auxiliary subunits are labeled with the corresponding subscripts. The hypothetical auxiliary subunits are obtained by rotating the experimental auxiliary subunits by  $90^\circ$  around the axis of ion channel 4-fold rotational symmetry. Obvious clashes are highlighted with red ovals. The numbers of residues that are missing in the loops of the auxiliary subunit structures are indicated.



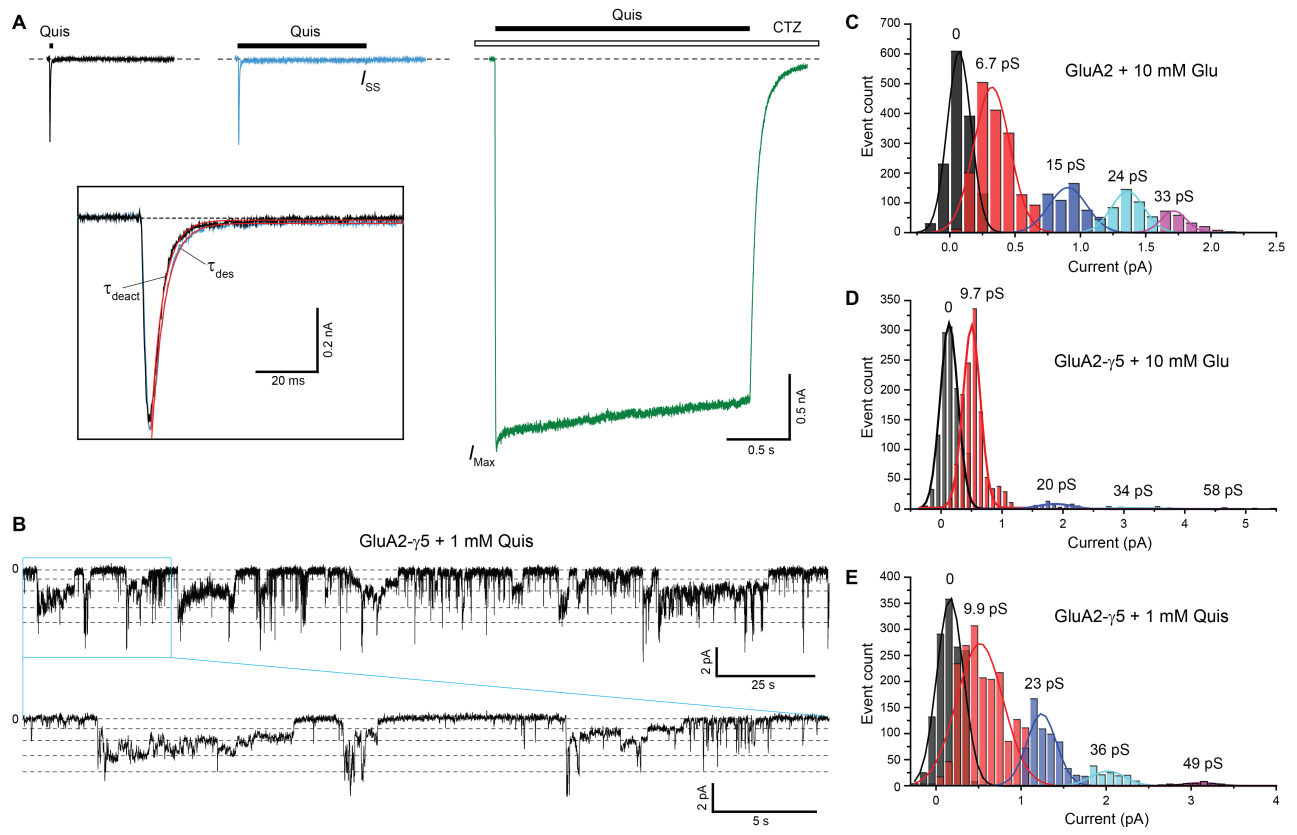

**F**

| Parameter \ Construct Ligand | GluA2                         |                              | GluA2 <sub>Mut</sub>         | GluA2- $\gamma$ 5              |                                | GluA2 <sub>Mut</sub> - $\gamma$ 5 | GluA2-GSG1L                   |                              |
|------------------------------|-------------------------------|------------------------------|------------------------------|--------------------------------|--------------------------------|-----------------------------------|-------------------------------|------------------------------|
|                              | Glu                           | Quis                         | Glu                          | Glu                            | Quis                           | Glu                               | Glu                           | Quis                         |
| $I_{SS}/I_{Max}$             | 0.042 $\pm$ 0.009<br>(n = 22) | 0.031 $\pm$ 0.007<br>(n = 6) | 0.042 $\pm$ 0.011<br>(n = 7) | 0.0091 $\pm$ 0.0029<br>(n = 6) | 0.0078 $\pm$ 0.0030<br>(n = 6) | 0.029 $\pm$ 0.009<br>(n = 8)      | 0.032 $\pm$ 0.008<br>(n = 13) | 0.023 $\pm$ 0.012<br>(n = 6) |
| $\tau_{Deact}$ (ms)          | 1.76 $\pm$ 0.24<br>(n = 9)    | 2.77 $\pm$ 0.19<br>(n = 8)   | 2.78 $\pm$ 0.20<br>(n = 4)   | 2.14 $\pm$ 0.15<br>(n = 8)     | 4.15 $\pm$ 0.25<br>(n = 6)     | 2.17 $\pm$ 0.08<br>(n = 7)        | 3.94 $\pm$ 0.43<br>(n = 11)   | 3.39 $\pm$ 0.32<br>(n = 11)  |
| $\tau_{Des}$ (ms)            | 7.7 $\pm$ 0.4<br>(n = 31)     | 6.3 $\pm$ 0.4<br>(n = 9)     | 9.9 $\pm$ 0.8<br>(n = 6)     | 9.3 $\pm$ 0.8<br>(n = 7)       | 5.09 $\pm$ 0.33<br>(n = 11)    | 9.6 $\pm$ 0.4<br>(n = 8)          | 8.95 $\pm$ 0.85<br>(n = 17)   | 5.14 $\pm$ 0.36<br>(n = 14)  |
| $\tau_{RecDes}$ (ms)         | 15.3 $\pm$ 1.1<br>(n = 14)    | 121 $\pm$ 7<br>(n = 5)       | 15.9 $\pm$ 0.7<br>(n = 5)    | 29.8 $\pm$ 1.9<br>(n = 6)      | 130 $\pm$ 4<br>(n = 10)        | 49.7 $\pm$ 3.0<br>(n = 6)         | 164 $\pm$ 11<br>(n = 7)       | 836 $\pm$ 31<br>(n = 8)      |

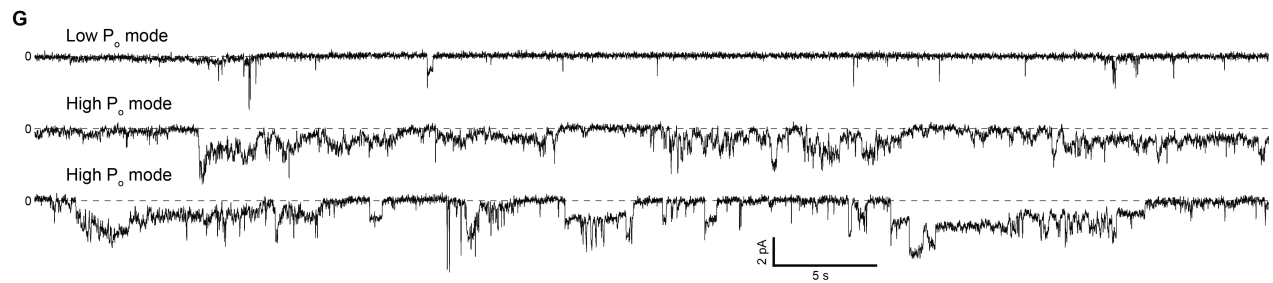

**Figure S3. Activation of GluA2- $\gamma$ 5 by quisqualate and functional characterization of different constructs, Related to Figure 1**

A. Representative whole-cell currents recorded at  $-60$  mV membrane potential from HEK 293 cell expressing GluA2- $\gamma$ 5 in response to 2-ms (black) or 1-s (blue) applications of 1 mM Quis alone or 2-s application of Quis in the continuous presence of 30  $\mu$ M CTZ (green). The inset shows normalized currents in response to 2-ms and 1-s applications of Quis alone fitted using single exponentials (red curves) with  $\tau_{\text{Deact}} = 3.99 \pm 0.25$  ms and  $\tau_{\text{Des}} = 4.40 \pm 0.17$  ms (mean  $\pm$  SEM). B. Representative single-channel current recorded at  $-60$  mV membrane potential in the continuous presence of 1 mM Quis and 100  $\mu$ M CTZ from GluA2- $\gamma$ 5 reconstituted into the lipid bilayer (upper trace), with an expanded view of the region indicated by the blue box (lower trace). Horizontal dashed lines indicate different conductance levels. C-E. Example amplitude histograms of single channel events from individual experiments with GuA2 (C) or GluA2- $\gamma$ 5 (D-E) incorporated into planar lipid bilayers and activated by 10 mM Glu (C-D) or 1 mM Quis (E) in the continuous presence of 100  $\mu$ M CTZ. Data was fitted with differently colored Gaussians, with the average conductance indicated above the corresponding components. F. Table of parameters. Shown are the non-desensitized fraction ( $I_{\text{SS}}/I_{\text{Max}}$ ) and the time constants of deactivation ( $\tau_{\text{Deact}}$ ), desensitization ( $\tau_{\text{Des}}$ ) and recovery from desensitization ( $\tau_{\text{RecDes}}$ ). The data for GluA2 and GluA2-GSG1L have been published previously (Twomey et al., 2017b; Yelshanskaya et al., 2017). The values presented are mean  $\pm$  SEM. G. Examples of low and high open probability modes that represent fragments of the same single-channel recording at  $-60$  mV membrane potential from GluA2- $\gamma$ 5 reconstituted into the lipid bilayer in the presence of 1 mM Quis and 100  $\mu$ M CTZ.



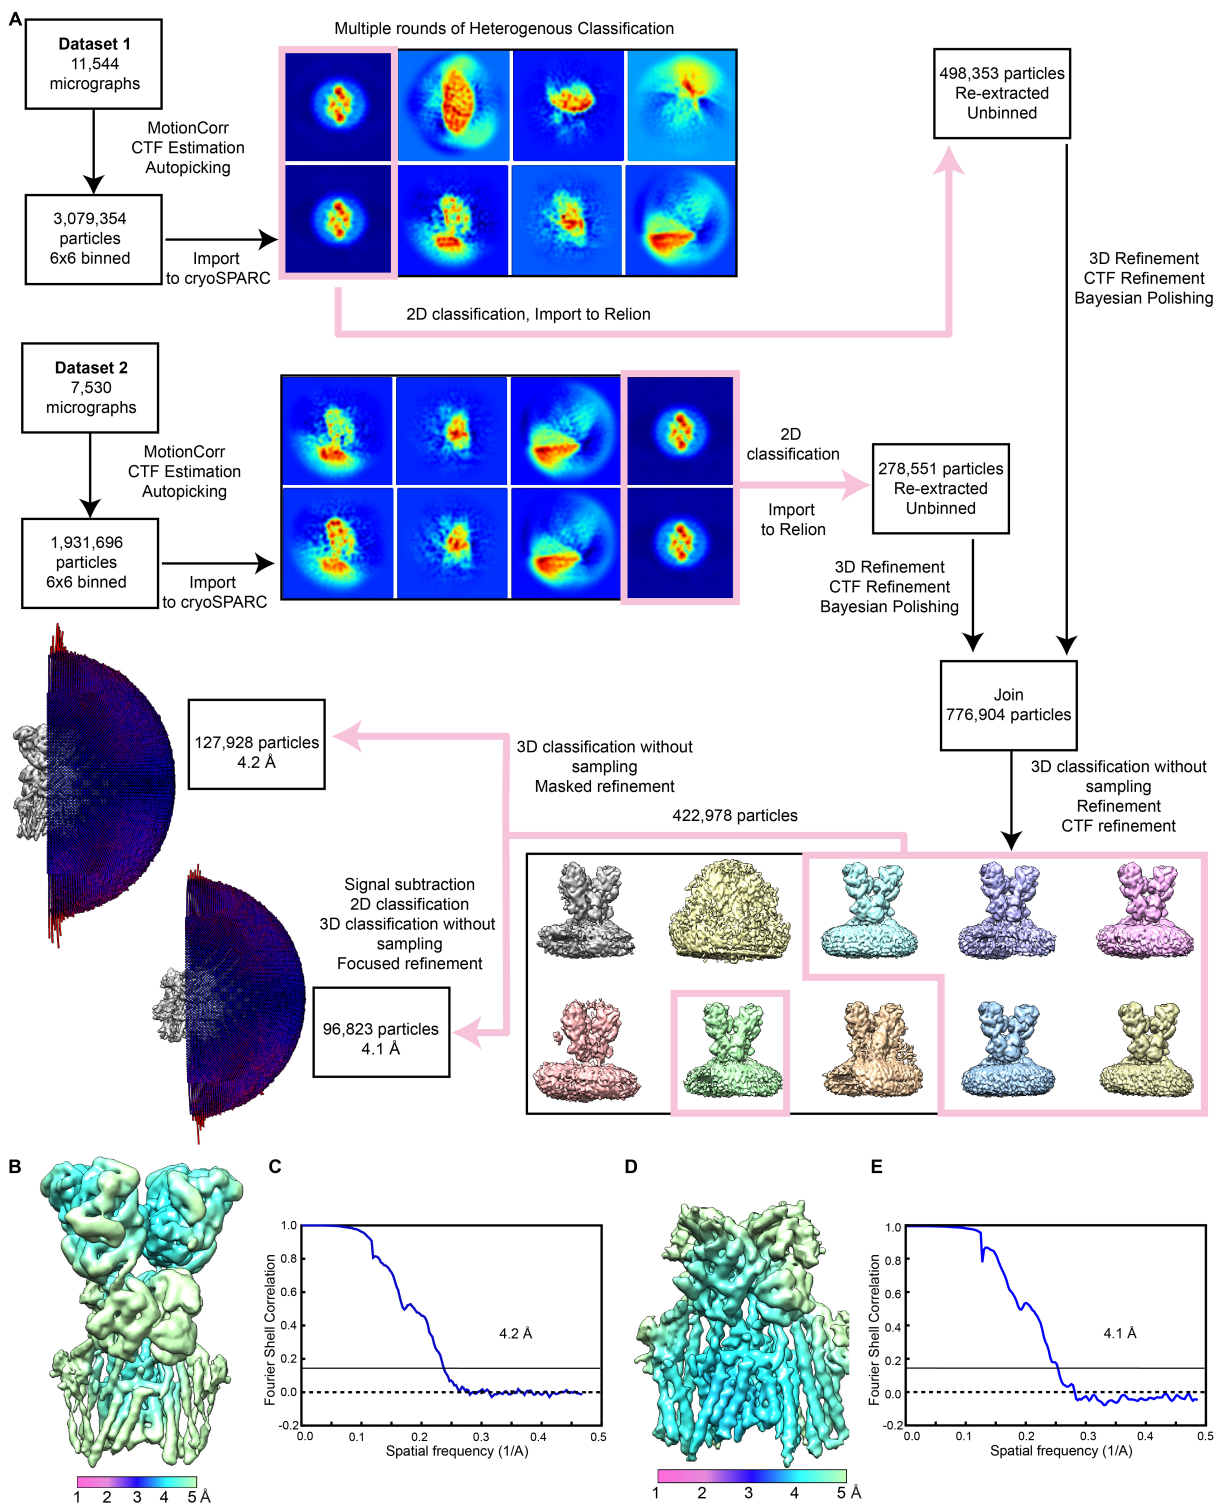

**Figure S4. Overview of single-particle cryo-EM for GluA2- $\gamma$ 5 in complex with agonist quisqualate, Related to Figure 4**

A. 3D reconstruction workflow involving Relion 3.1 and cryoSPARC. Included are distributions of particle Euler angle orientations contributing to the full-length and LBD-TMD-focused reconstructions of GluA2- $\gamma$ 5<sub>Quis</sub>, with larger red cylinders representing orientations comprising more particles. B-E. Local resolution presented as coloring of the cryo-EM map (B and D) and FSC curves (C and E) for the full-length (B and C) and LBD-TMD-focused (D and E) reconstructions of GluA2- $\gamma$ 5<sub>Quis</sub>.

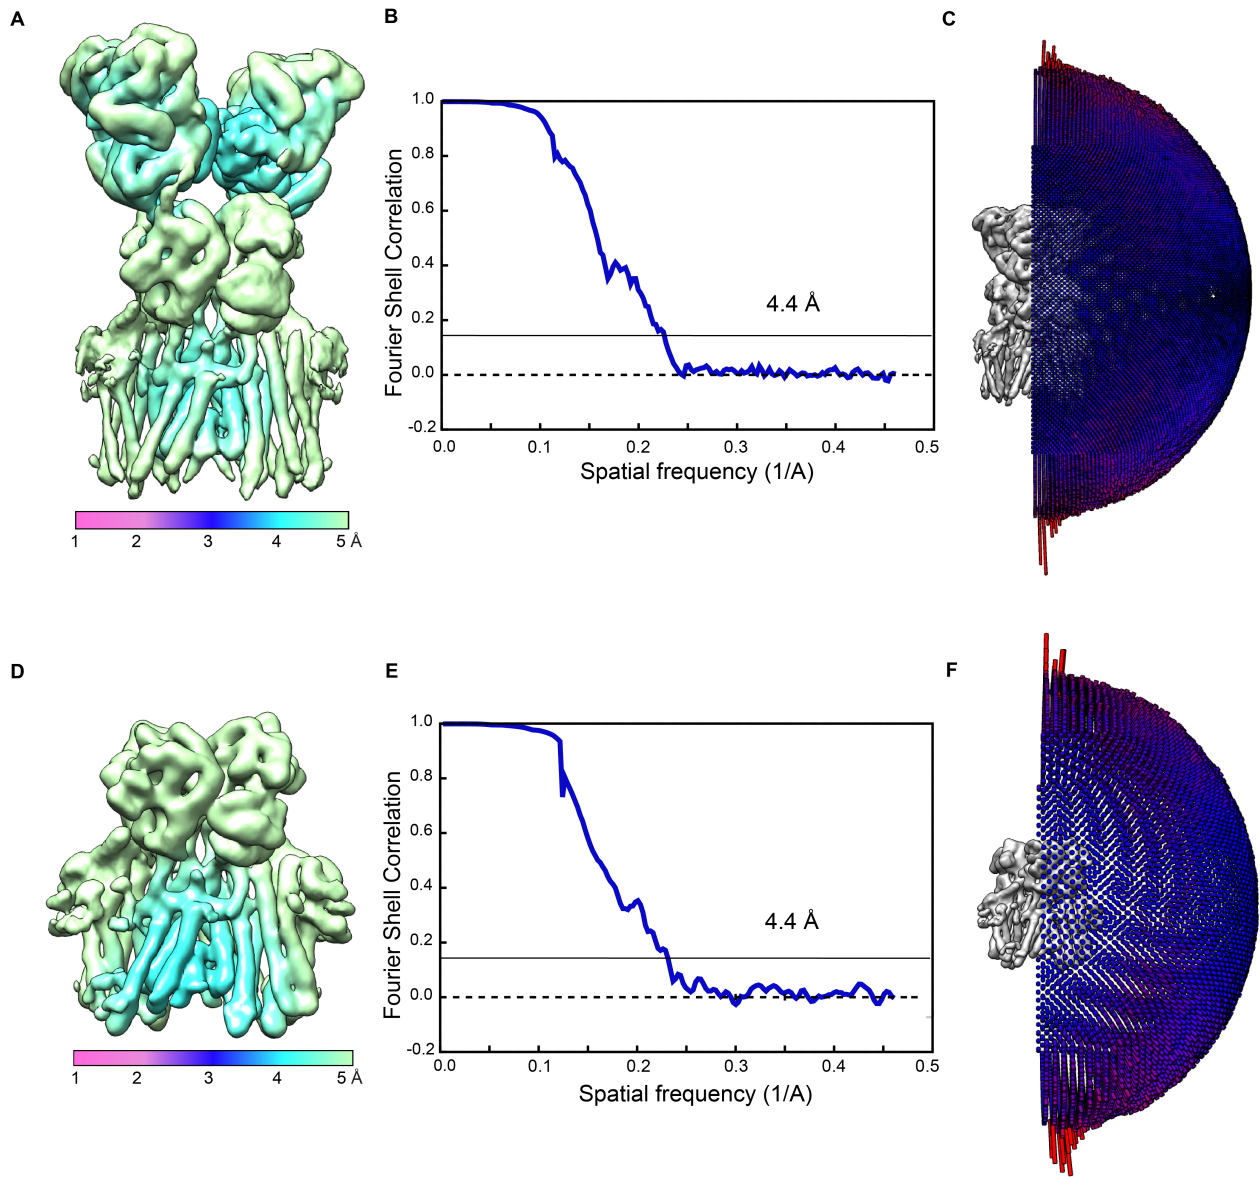

**Figure S5. Overview of single-particle cryo-EM for GluA2- $\gamma$ 5 in complex with agonist glutamate, Related to Figure 4**

A-F. Local resolution presented as coloring of the cryo-EM map (A and D), FSC curves (B and E), and distribution of particle Euler angle orientations contributing to the final reconstruction (C and F) for the full-length (A-C) and LBD-TMD-focused (D-F) reconstructions of GluA2- $\gamma$ 5<sub>Glu</sub>.



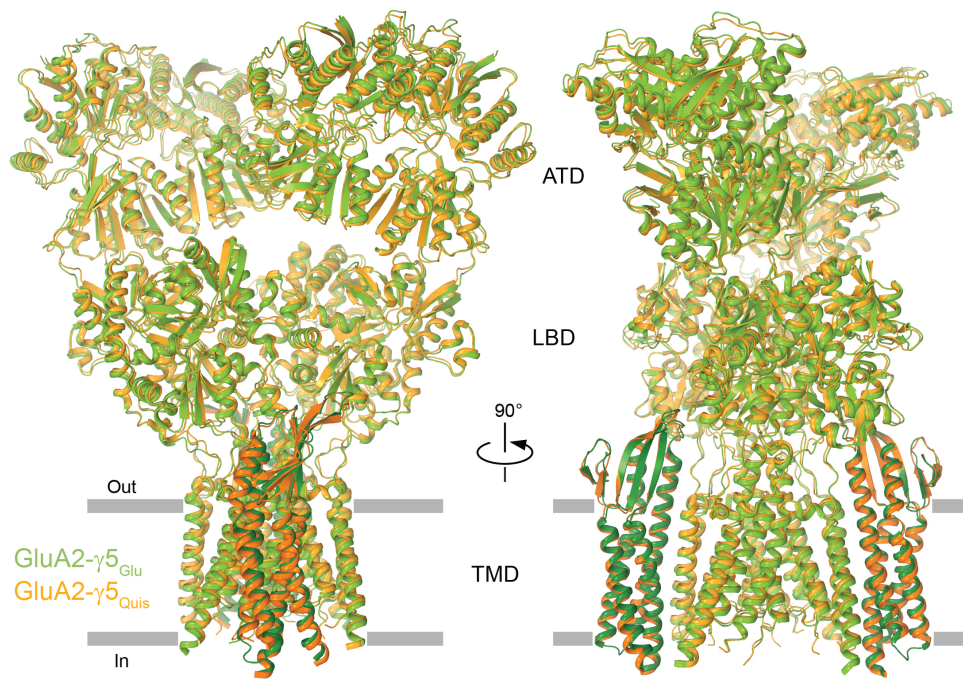

**Figure S6. Comparison of GluA2- $\gamma$ 5<sub>Glu</sub> and GluA2- $\gamma$ 5<sub>Quis</sub> structures, Related to Figure 4**

Superposition of GluA2- $\gamma$ 5<sub>Glu</sub> and GluA2- $\gamma$ 5<sub>Quis</sub> viewed parallel to the membrane, with GluA2 subunits shown in light green and orange, and  $\gamma$ 5 in dark green and orange colors, respectively.

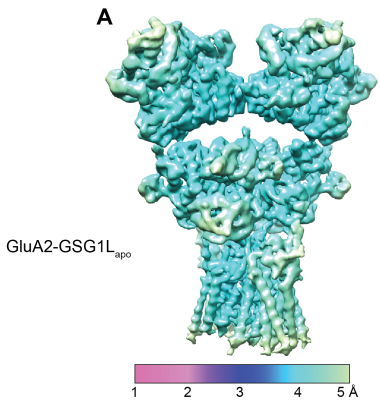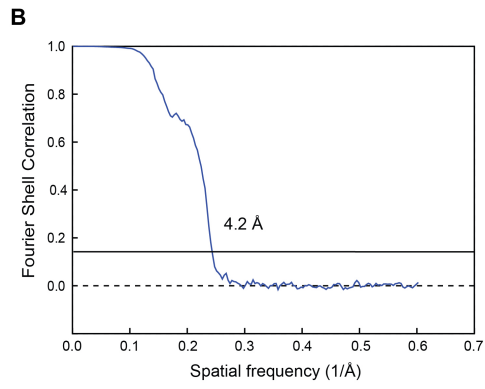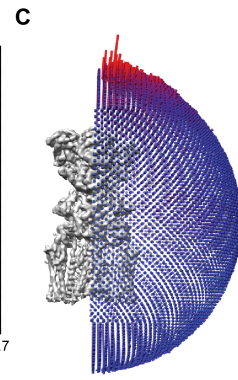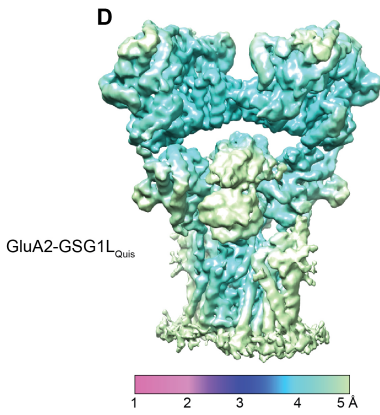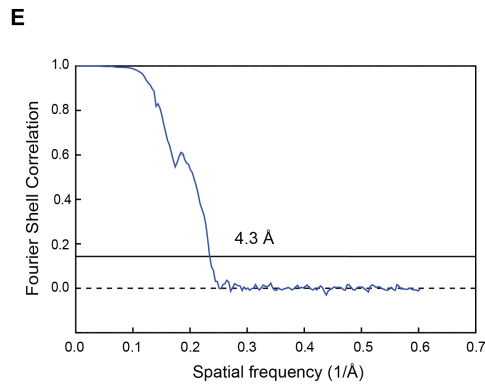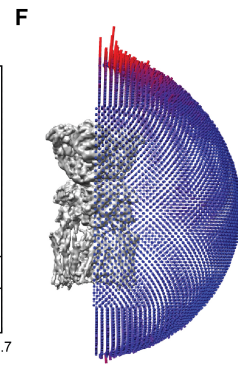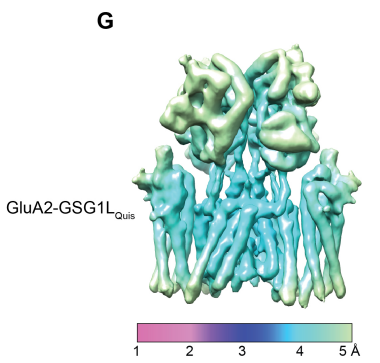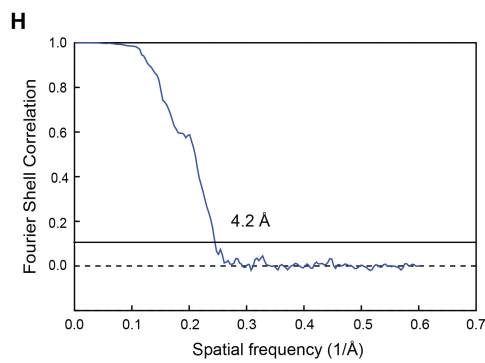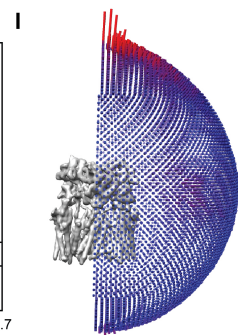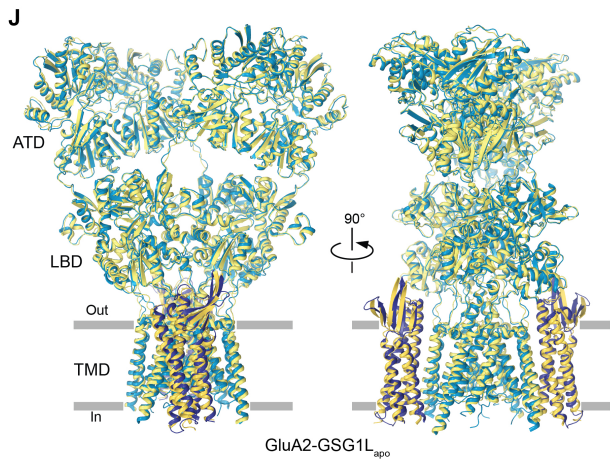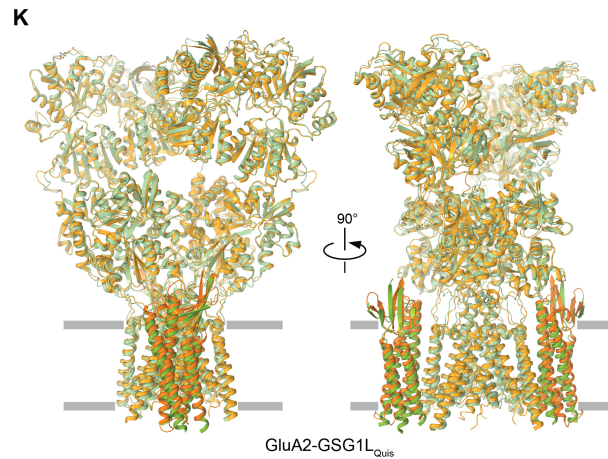



**Figure S7. Overview of cryo-EM and comparison of GluA2-GSG1L structures, Related to Figure 6**

A-I. Local resolution presented as coloring of the cryo-EM map (A, D, and G), FSC curves (B, E, and H), and distribution of particle Euler angle orientations contributing to the final reconstruction (C, F, and I) for the full-length reconstruction of GluA2-GSG1L<sub>apo</sub> (A-C), and full-length (D-F) and LBD-TMD-focused (G-I) reconstructions of GluA2-GSG1L<sub>Quis</sub>. J-K. Superposition of the new 4.2-Å resolution (GluA2 in light blue and  $\gamma$ 5 in dark blue) and previously published 6.1-Å resolution (PDB ID: 5WEM; GluA2 in light yellow and  $\gamma$ 5 in dark yellow) GluA2-GSG1L<sub>apo</sub> (J) and new 4.3-Å resolution (GluA2 in light orange and  $\gamma$ 5 in dark orange) and previously published 8.4-Å resolution (PDB ID: 5VHZ; GluA2 in light green and  $\gamma$ 5 in dark green) GluA2-GSG1L<sub>Quis</sub> (K).

**Table S1. Cryo-EM data collection, refinement and validation statistics, Related to Figures 1 and 4 .**

| Structure                                 | GluA2- $\gamma$ <sub>ZK</sub><br>FL | GluA2- $\gamma$ <sub>ZK</sub><br>LBD-TMD | GluA2- $\gamma$ <sub>Glu</sub><br>FL | GluA2- $\gamma$ <sub>Glu</sub><br>LBD-TMD | GluA2- $\gamma$ <sub>Quis</sub><br>FL | GluA2- $\gamma$ <sub>Quis</sub><br>LBD-TMD | GluA2-GSG1L <sub>apo</sub><br>FL | GluA2-GSG1L <sub>Quis</sub><br>FL | GluA2-GSG1L <sub>Quis</sub><br>LBD-TMD |
|-------------------------------------------|-------------------------------------|------------------------------------------|--------------------------------------|-------------------------------------------|---------------------------------------|--------------------------------------------|----------------------------------|-----------------------------------|----------------------------------------|
| EMDB accession code                       | EMD-24750                           | EMD-24751                                | EMD-24752                            | EMD-24748                                 | EMD-24753                             | EMD-24754                                  | EMD-24755                        | EMD-24756                         | EMD-24749                              |
| PDB accession code                        | 7RZ4                                | 7RZ5                                     | 7RZ6                                 | 7RYY                                      | 7RZ7                                  | 7RZ8                                       | 7RZ9                             | 7RZA                              | 7RYZ                                   |
| <b>Data collection and processing</b>     |                                     |                                          |                                      |                                           |                                       |                                            |                                  |                                   |                                        |
| Magnification                             | 81,000                              | 81,000                                   | 81,000                               | 81,000                                    | 81,000                                | 81,000                                     | 105,000                          | 105,000                           | 105,000                                |
| Voltage (kV)                              | 300                                 | 300                                      | 300                                  | 300                                       | 300                                   | 300                                        | 300                              | 300                               | 300                                    |
| Electron exposure (e-/Å <sup>2</sup> )    | 62.5                                | 62.5                                     | 51.18                                | 51.18                                     | 51.1                                  | 51.1                                       | 58                               | 58                                | 58                                     |
| Defocus range (μm)                        | -1 to -2                            | -1 to -2                                 | -1 to -2                             | -1 to -2                                  | -1 to -2                              | -1 to -2                                   | -1 to -2                         | -1 to -2                          | -1 to -2                               |
| Pixel size (Å)                            | 1.1                                 | 1.1                                      | 1.076                                | 1.076                                     | 1.069                                 | 1.069                                      | 0.83                             | 0.83                              | 0.83                                   |
| Symmetry imposed                          | C2                                  | C2                                       | C2                                   | C2                                        | C2                                    | C2                                         | C2                               | C2                                | C2                                     |
| Micrographs                               | 26,996                              | 26,996                                   | 13,626                               | 13,626                                    | 19,074                                | 19,074                                     | 10,207                           | 10,824                            | 10,824                                 |
| Initial particle images (no.)             | 7,073,223                           | 7,073,223                                | 3,712,556                            | 3,712,556                                 | 5,011,050                             | 5,011,050                                  | 1,515,005                        | 1,627,160                         | 1,627,160                              |
| Final particle images (no.)               | 134091                              | 111,527                                  | 130,204                              | 99056                                     | 127928                                | 96823                                      | 124,571                          | 118,416                           | 113,568                                |
| Map resolution (Å)                        | 3.6                                 | 3.3                                      | 4.4                                  | 4.4                                       | 4.2                                   | 4.1                                        | 4.15                             | 4.26                              | 4.15                                   |
| FSC threshold                             | 0.143                               | 0.143                                    | 0.143                                | 0.143                                     | 0.143                                 | 0.143                                      | 0.143                            | 0.143                             | 0.143                                  |
| Map resolution range (Å)                  | 3.3 to 6.9                          | 3 to 6.4                                 | 4.1 to 8.0                           | 4.1 to 5.7                                | 3.9 to 8.4                            | 3.8 to 4.8                                 | 3.8 to 11.1                      | 4 to 13.8                         | 3.8 to 7.2                             |
| <b>Refinement</b>                         |                                     |                                          |                                      |                                           |                                       |                                            |                                  |                                   |                                        |
| Model resolution (Å)                      | 3.6                                 | 3.3                                      | 4.4                                  | 4.4                                       | 4.2                                   | 4.1                                        | 4.15                             | 4.26                              | 4.15                                   |
| FSC threshold                             | 0.143                               | 0.143                                    | 0.143                                | 0.143                                     | 0.143                                 | 0.143                                      | 0.143                            | 0.143                             | 0.143                                  |
| Model resolution range (Å)                | 3.3 to 6.9                          | 3 to 6.4                                 | 4.1 to 8.0                           | 4.1 to 5.7                                | 3.9 to 8.4                            | 3.8 to 4.8                                 | 3.8 to 11.1                      | 4 to 13.8                         | 3.8 to 7.2                             |
| Map sharpening B factor (Å <sup>2</sup> ) | -79.86                              | -39.00                                   | -157.12                              | -125.84                                   | -153.45                               | -128.94                                    | -202.72                          | -165.46                           | -146.128                               |
| <b>Model composition</b>                  |                                     |                                          |                                      |                                           |                                       |                                            |                                  |                                   |                                        |
| Non-hydrogen atoms                        | 29002                               | 16774                                    | 27922                                | 15836                                     | 28054                                 | 16722                                      | 27938                            | 27854                             | 15746                                  |
| Ligands                                   | 108                                 | 108                                      | 40                                   | 40                                        | 52                                    | 52                                         | 0                                | 52                                | 52                                     |
| Sugar-NAG                                 | 56                                  | 0                                        | 0                                    | 0                                         | 0                                     | 0                                          | 0                                | 0                                 | 0                                      |
| Number of Protein residues                | 3,574                               | 2,046                                    | 3,534                                | 2,020                                     | 3,554                                 | 2,038                                      | 3,550                            | 3,532                             | 2,014                                  |
| <b>B factors (Å<sup>2</sup>)</b>          |                                     |                                          |                                      |                                           |                                       |                                            |                                  |                                   |                                        |
| Protein                                   | 81.44                               | 86.13                                    | 155.95                               | 213.19                                    | 151.51                                | 125.33                                     | 65.64                            | 68.95                             | 120.32                                 |
| Ligands                                   | 54.27                               | 48.57                                    | 79.51                                | 117.92                                    | 195.83                                | 55.34                                      | -                                | 64.59                             | 115.42                                 |
| <b>r.m.s. deviations</b>                  |                                     |                                          |                                      |                                           |                                       |                                            |                                  |                                   |                                        |
| Bond lengths (Å)                          | 0.0                                 | 0.01                                     | 0.00                                 | 0.00                                      | 0.01                                  | 0.00                                       | 0.01                             | 0.01                              | 0.00                                   |
| Bond angles (°)                           | 0.75                                | 0.83                                     | 0.85                                 | 0.91                                      | 0.88                                  | 0.93                                       | 0.86                             | 0.88                              | 0.86                                   |
| <b>Validation</b>                         |                                     |                                          |                                      |                                           |                                       |                                            |                                  |                                   |                                        |
| MolProbity score                          | 1.23                                | 1.20                                     | 1.56                                 | 1.56                                      | 1.56                                  | 1.55                                       | 1.52                             | 1.51                              | 1.39                                   |
| Clashscore                                | 2.80                                | 2.06                                     | 4.73                                 | 5.99                                      | 4.92                                  | 5.13                                       | 3.46                             | 4.30                              | 3.89                                   |
| Poor rotamers (%)                         | 0.13 %                              | 0.12                                     | 0.27                                 | 0.35                                      | 0.53                                  | 0.46                                       | 0.26                             | 0.40                              | 0.12                                   |
| <b>Ramachandran plot</b>                  |                                     |                                          |                                      |                                           |                                       |                                            |                                  |                                   |                                        |
| Favored (%)                               | 96.90                               | 96.19                                    | 95.15                                | 96.03                                     | 95.43                                 | 95.73                                      | 94.19                            | 95.55                             | 96.28                                  |
| Allowed (%)                               | 3.10                                | 3.81                                     | 4.85                                 | 3.97                                      | 4.45                                  | 4.17                                       | 5.81                             | 4.45                              | 3.72                                   |
| Outliers (%)                              | 0                                   | 0                                        | 0                                    | 0                                         | 0.11                                  | 0.10                                       | 0                                | 0                                 | 0                                      |
